# Supplementary material for: Salt-derived lysosome impairment provokes tubular damage via mitochondrial quality control defects
Source: Research Square preprint supplement (doi:10.21203/rs.3.rs-6609637/v1), 2025-06-20
Supplement: Supplementary file 1 [file 5582ec68c1f5dff35f476da9.ai]

# Supplementary Figure 2

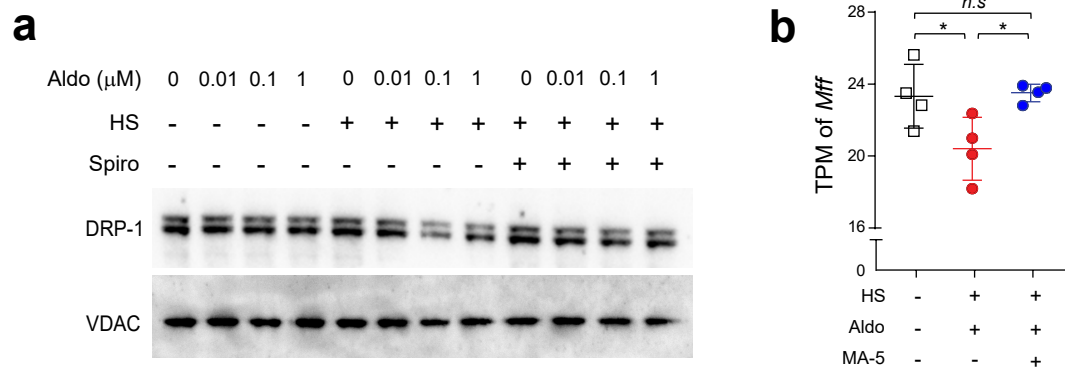

**Supplementary Fig. 2. The exposure of TECs to HS and Aldo affects DRP-1 and Mff, which is independent of MR.**

(a) Western blots for DRP-1 and VDAC in MDCTs treated with HS in the presence of several concentration of Aldo with or without Spiro. (b) Mff in HS+Aldo-treated MDCTs in the presence or absence of MA-5 in data set of our RNAseq. Each group consisted of four different samples. \*P<0.05, \*\*P<0.01, \*\*\*P<0.001, and \*\*\*\*P<0.0001. HS, high salt; Spiro, spironolactone; Aldo, aldosterone; TPM, transcripts per kilobase million.
