# Supplementary material for: Salt-derived lysosome impairment provokes tubular damage via mitochondrial quality control defects
Source: Research Square preprint supplement (doi:10.21203/rs.3.rs-6609637/v1), 2025-06-20
Supplement: Supplementary file 2 [file 972f1e2eabc9e7b69e21db6e.ai]

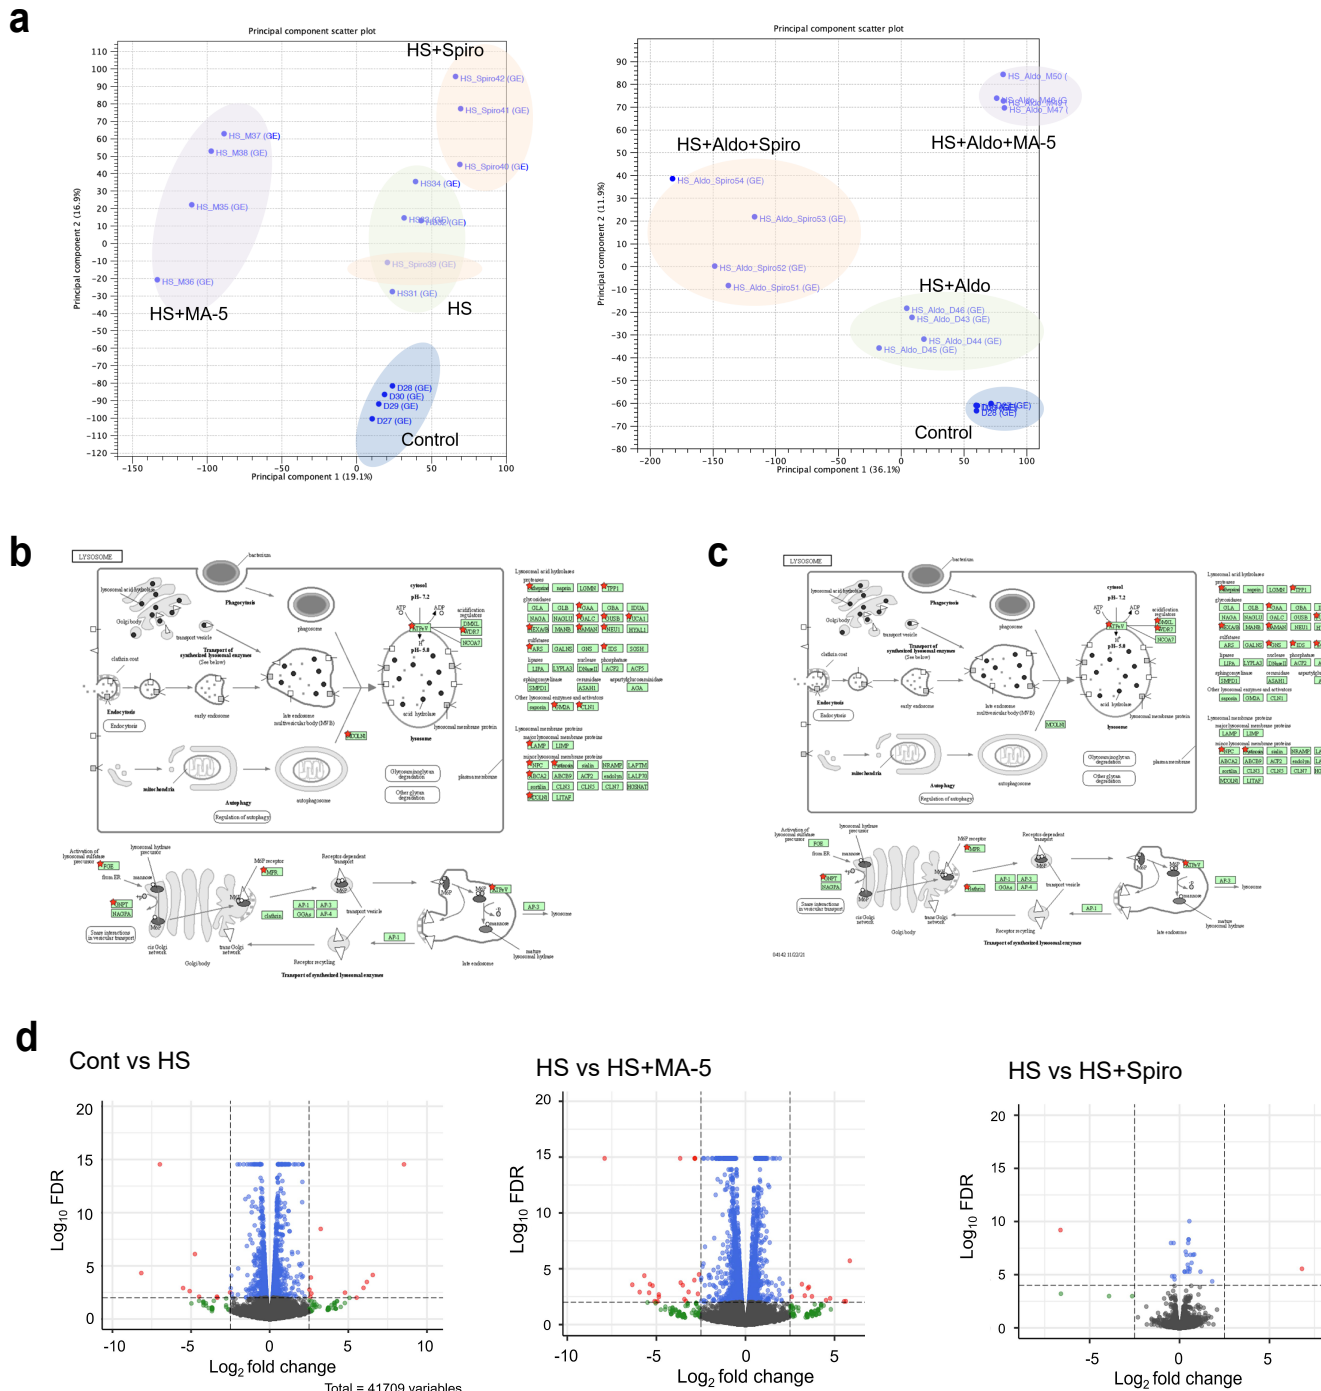

**Supplementary Fig. 1. HS derives lysosomal dysfunction that can be prevented by MA-5, but not spiro.**

(a) Principal component analysis scatter plot in RNA sequencing with MDCTs treated with HS or HS+Aldo in the presence or absence of MA-5 or Spiro. (b) KEGG enrichment analysis in the RNAseq of MDCTs treated with HS or HS+MA-5. (c) KEGG enrichment analysis in the RNAseq of MDCTs treated with HS+Aldo in the presence or absence of MA-5. (d) Volcano blots in RNA sequencing with MDCTs treated with HS or HS+Aldo in the presence or absence of MA-5 or Spiro. HS, high salt; Spiro, spironolactone; FDR, false discovery rate.
